# Supplementary material for: HOXC10 promotes tumour metastasis by regulating the EMT-related gene Slug in ovarian cancer
Source: publisher site journal article supplement (doi:10.18632/aging.103824), 2020-09-07
Supplement: Supplementary file [file aging-v12i19-103824-supplementary-material-SD2.pdf]

**SUPPLEMENTARY TABLES**

**Supplementary Table 1. Univariate and multivariate analyses for overall survival of OC patients (N=158).**

| Variable                                  | Univariate |       |       |       | Multivariate |       |       |       |
|-------------------------------------------|------------|-------|-------|-------|--------------|-------|-------|-------|
|                                           | P          | HR    | 95%CI |       | P            | HR    | 95%CI |       |
| Age at diagnosis (<50 y vs. ≥50 y)        | 0.077      | 0.679 | 0.442 | 1.043 | -            | -     | -     | -     |
| Histologic type (Serious vs. Nonserious)  | 0.062      | 0.656 | 0.422 | 1.022 | -            | -     | -     | -     |
| FIGO Stage (I/II/III vs. IV)              | 0.011      | 0.627 | 0.437 | 0.901 | 0.03         | 0.663 | 0.458 | 0.961 |
| Survival state (Alive vs. Dead)           | 0.004      | 0.532 | 0.346 | 0.819 | 0.009        | 0.557 | 0.358 | 0.865 |
| Distant metastasis (Absence vs. presence) | 0.013      | 0.633 | 0.441 | 0.909 | 0.018        | 0.639 | 0.442 | 0.926 |
| HOXC10 level (low vs. high)               | 0.005      | 0.522 | 0.333 | 0.819 | 0.008        | 0.516 | 0.315 | 0.843 |

Samples: The Xiangya Hospital (Changsha, China); CI: confidence interval; HR: hazard ratio

**Supplementary Table 2. Candidate microRNAs from three prediction websites.**

| Prediction websites | Candidate microRNAs |                  |                   |                  |                       |                       |                  |                |
|---------------------|---------------------|------------------|-------------------|------------------|-----------------------|-----------------------|------------------|----------------|
| miRDB               | hsa-miR-7106-5p     | hsa-miR-1299     | hsa-miR-4739      | hsa-miR-548x-5p  | hsa-miR-4756-5p       | hsa-miR-548aj-5p      | hsa-miR-548g-5p  |                |
|                     | hsa-miR-1321        | hsa-miR-548f-5p  | hsa-miR-4533      | hsa-miR-136-5p   | hsa-miR-4775          | hsa-miR-12119         | hsa-miR-875-3p   |                |
|                     | hsa-miR-3148        | hsa-miR-4733-3p  | hsa-miR-9983-3p   | hsa-miR-510-5p   | hsa-miR-515-5p        | hsa-miR-33a-5p        | hsa-miR-519e-5p  |                |
|                     | hsa-miR-33b-5p      | hsa-miR-1908-5p  | hsa-miR-10396b-5p | hsa-miR-663a     | hsa-miR-129-5p        | hsa-miR-6787-5p       | hsa-miR-5706     |                |
|                     | hsa-miR-4782-5p     | hsa-miR-5011-3p  | hsa-miR-766-5p    | hsa-miR-6891-5p  | hsa-miR-4441          | hsa-miR-1251-3p       | hsa-miR-516b-5p  |                |
|                     | hsa-miR-3529-3p     | hsa-miR-4436a    | hsa-miR-5000-3p   | hsa-miR-3173-3p  | hsa-miR-12118         | hsa-miR-4270          | hsa-miR-6754-5p  |                |
|                     | hsa-miR-1468-3p     | hsa-miR-765      | hsa-miR-11181-3p  | hsa-miR-302b-5p  | hsa-miR-4762-3p       | hsa-miR-302d-5p       | hsa-miR-7110-5p  |                |
|                     | hsa-miR-7162-3p     | hsa-miR-6799-5p  | hsa-miR-6842-5p   | hsa-miR-4749-5p  | hsa-miR-4706          | hsa-miR-329-5p        | hsa-miR-10b-3p   |                |
|                     | hsa-miR-6876-5p     | hsa-miR-4476     | hsa-miR-6878-5p   | hsa-miR-6752-5p  | hsa-miR-6068          | hsa-miR-6780a-3p      | hsa-miR-4689     |                |
|                     | hsa-miR-3915        | hsa-miR-6128     | hsa-miR-4729      | hsa-miR-4303     | hsa-miR-5093          | hsa-miR-4269          | hsa-miR-6867-5p  |                |
|                     | hsa-miR-6715b-5p    | hsa-miR-5582-5p  | hsa-miR-30c-2-3p  | hsa-miR-30c-1-3p | hsa-miR-6788-5p       | hsa-miR-362-3p        | hsa-miR-329-3p   |                |
|                     | hsa-miR-6780a-5p    | hsa-miR-6828-5p  | hsa-miR-3183      | hsa-miR-1224-5p  | hsa-miR-4673          | hsa-miR-4326          | hsa-miR-4645-5p  |                |
|                     | hsa-miR-6780b-3p    | hsa-miR-6805-3p  | hsa-miR-5691      | hsa-miR-6858-5p  | <b>hsa-miR-222-3p</b> | hsa-miR-12120         | hsa-miR-221-3p   |                |
|                     | hsa-miR-6892-3p     | hsa-miR-4780     | hsa-miR-6824-3p   | hsa-miR-6764-3p  | hsa-miR-3679-5p       | hsa-miR-3680-3p       | hsa-miR-6769b-3p |                |
|                     | hsa-miR-3605-5p     | hsa-miR-4779     | hsa-miR-4518      | hsa-miR-4521     | hsa-miR-4723-3p       | hsa-miR-1266-5p       | hsa-miR-103a-3p  |                |
|                     | hsa-miR-107         | hsa-miR-7157-3p  | hsa-miR-6737-3p   | hsa-miR-3616-3p  | hsa-miR-6079          | hsa-miR-6785-5p       | hsa-miR-4728-5p  |                |
|                     | hsa-miR-1226-3p     | hsa-miR-1185-5p  | hsa-miR-8085      | hsa-miR-5008-3p  | hsa-miR-6731-5p       | hsa-miR-6888-3p       | hsa-miR-6811-3p  |                |
|                     | hsa-miR-4474-5p     | hsa-miR-6853-5p  | hsa-miR-7161-5p   | hsa-miR-149-3p   | hsa-miR-1275          | hsa-miR-3202          | hsa-miR-6883-5p  |                |
|                     | hsa-miR-5001-3p     | hsa-miR-1911-3p  | hsa-miR-6779-5p   | hsa-miR-651-3p   | hsa-miR-3689b-3p      | hsa-miR-1273h-5p      | hsa-miR-3689c    |                |
|                     | hsa-miR-30b-3p      | hsa-miR-3689a-3p |                   |                  |                       |                       |                  |                |
|                     | miRanda             | hsa-miR-296-3p   | hsa-miR-760       | hsa-miR-623      | hsa-miR-574-5p        | hsa-miR-641           | hsa-miR-511      | hsa-miR-220    |
|                     |                     | hsa-miR-129-5p   | hsa-miR-329       | hsa-miR-33a      | hsa-miR-603           | hsa-miR-662           | hsa-miR-329      | hsa-miR-362-3p |
|                     |                     | hsa-miR-935      | hsa-miR-603       | hsa-miR-33b      | hsa-miR-362-3p        | <b>hsa-miR-222-3p</b> | hsa-miR-425      | hsa-miR-28-3p  |
|                     |                     | hsa-miR-34c-3p   | hsa-miR-514       |                  |                       |                       |                  |                |
|                     | PicTar              | hsa-miR-136      | hsa-miR-129       | hsa-miR-221-3p   | hsa-miR-222-3p        |                       |                  |                |
